# Supplementary material for: Synthesis and Characterization of Temperature-Responsive N-Cyanomethylacrylamide-Containing Diblock Copolymer Assemblies in Water
Source: MDPI journal article supplement (doi:10.3390/polym13244424), 2021-12-16
Supplement: s1 [file s1]

## Supplementary Information

Synthesis and characterization of temperature-responsive

*N*-cyanomethylacrylamide-containing diblock copolymer assemblies  
in water

Nicolas Audureau<sup>1</sup>, Fanny Coumes<sup>1</sup>, Clémence Veith<sup>1</sup>, Clément Guibert<sup>2</sup>, Jean-Michel Guigner<sup>3</sup>, François Stoffelbach<sup>1\*</sup>, Jutta Rieger<sup>1\*</sup>

<sup>1</sup> Sorbonne Université & CNRS, UMR 8232, Institut Parisien de Chimie Moléculaire (IPCM), Polymer Chemistry Team, 4 Place Jussieu, 75252 Paris Cedex 05, France

[jutta.rieger@sorbonne-universite.fr](mailto:jutta.rieger@sorbonne-universite.fr); [francois.stoffelbach@sorbonne-universite.fr](mailto:francois.stoffelbach@sorbonne-universite.fr)

<sup>2</sup> Sorbonne Université, CNRS, Laboratoire de Réactivité de Surface (LRS), 4 Place Jussieu, 75252 Paris Cedex 05, France

<sup>3</sup> Sorbonne Université & CNRS, UMR 7590, Institut de Minéralogie, de Physique des Matériaux et de Cosmochimie (IMPMC)-IRD-MNHN, 75252 Paris Cedex 05, France

### 1. Synthesis of the PDMAm macroRAFT agents

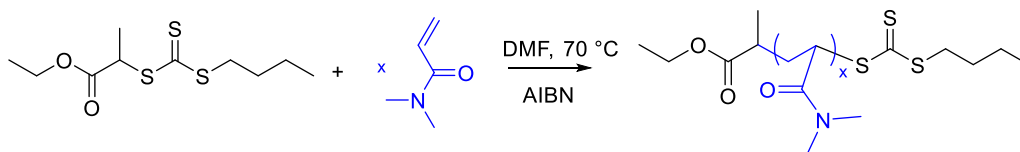

**Scheme S1.** Synthesis route for the PDMAm-TTC macroRAFT agents *via* RAFT-mediated solution polymerization in the presence of CTA-1.

**Table S1.** Experimental conditions and results for the RAFT-mediated polymerization of DMAm in DMF at 70 °C<sup>#</sup>

| Entry | $\frac{[\text{DMAm}]_0}{[\text{CTA-1}]_0}$ <sup>a</sup> | $[\text{DMAm}]_0$<br>(mol L <sub>DMF</sub> <sup>-1</sup> ) | Time<br>(min) | Conv. <sup>b</sup><br>(%) | $DP_{n,\text{th}}$ <sup>c</sup> | $DP_n$ <sup>b</sup> | $M_{n,\text{th}}$ <sup>d</sup><br>(kg mol <sup>-1</sup> ) | SEC DMF <sup>e</sup>                          |                            |
|-------|---------------------------------------------------------|------------------------------------------------------------|---------------|---------------------------|---------------------------------|---------------------|-----------------------------------------------------------|-----------------------------------------------|----------------------------|
|       |                                                         |                                                            |               |                           |                                 |                     |                                                           | $M_n$ <sup>e</sup><br>(kg mol <sup>-1</sup> ) | $\mathcal{D}$ <sup>e</sup> |
| M1    | 23                                                      | 2.5                                                        | 80            | 59                        | 14                              | 13                  | 1.55                                                      | 1.35                                          | 1.12                       |
| M2    | 29                                                      | 2.4                                                        | 93            | 64                        | 19                              | 23                  | 2.55                                                      | 2.22                                          | 1.09                       |
| M3    | 46                                                      | 2.3                                                        | 210           | 74                        | 34                              | 36                  | 3.83                                                      | 3.19                                          | 1.09                       |

<sup>#</sup>Polymerizations were performed in the presence of a RAFT agent (CTA-1) using AIBN as a radical initiator at an initial molar ratio of CTA-1/AIBN: 1/0.05. <sup>a</sup> Initial monomer/CTA-1 molar ratio. <sup>b</sup> Determined by <sup>1</sup>H NMR (for the determination of the  $DP_n$  of M3 see Figure S1). <sup>c</sup> Theoretical number-average degree of polymerization,  $DP_{n,\text{th}}$  calculated using the experimental conversion. <sup>d</sup> Theoretical number-average molar mass,  $M_{n,\text{th}}$ , calculated using  $DP_{n,\text{th}}$ . <sup>e</sup> Number-average molar mass,  $M_n$  and dispersity,  $\mathcal{D}$ , determined by SEC in DMF (+ LiBr 1 g L<sup>-1</sup>) with a PMMA calibration.

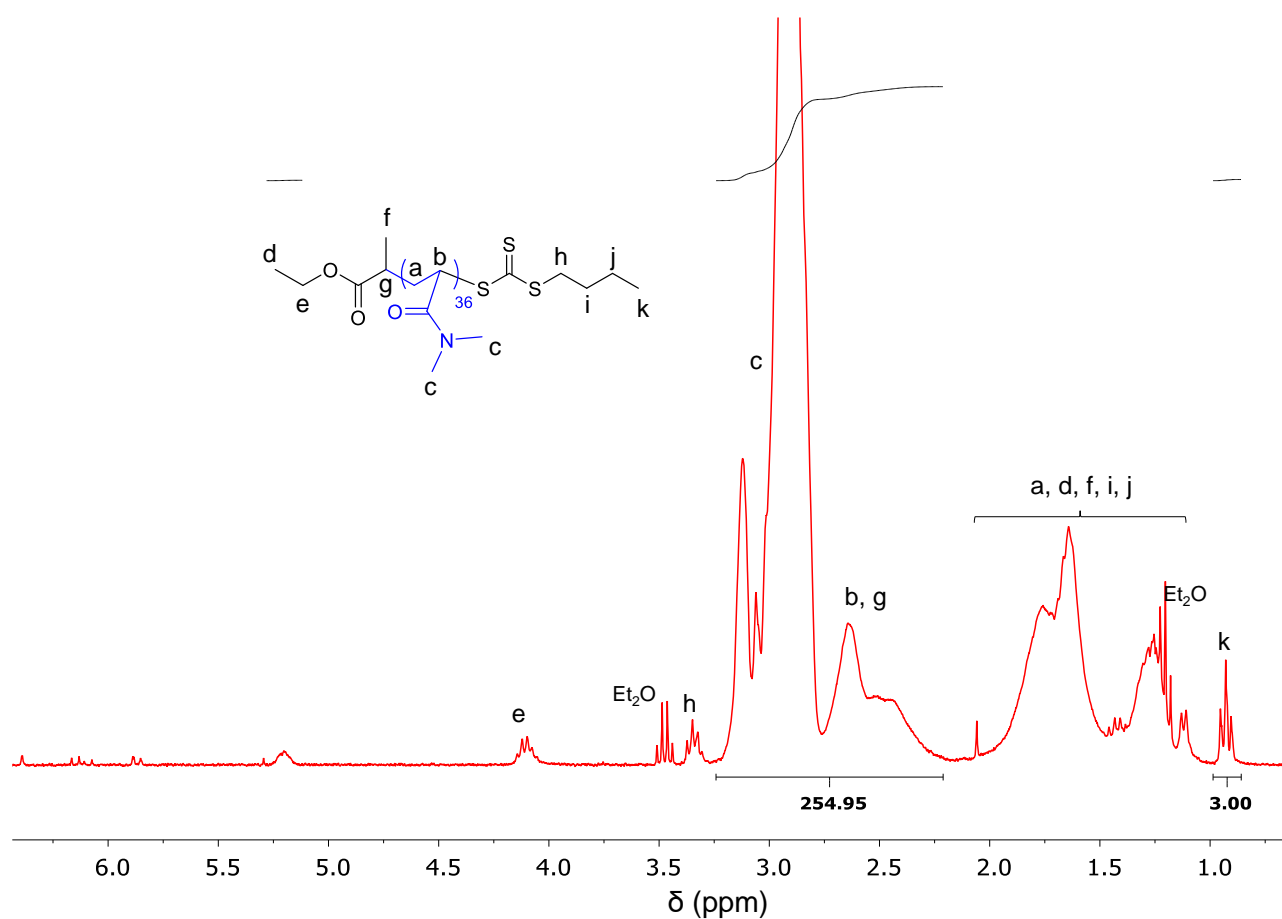

**Figure S1.**  $^1\text{H}$  NMR spectrum of M3 (Table S1) in  $\text{CDCl}_3$ .

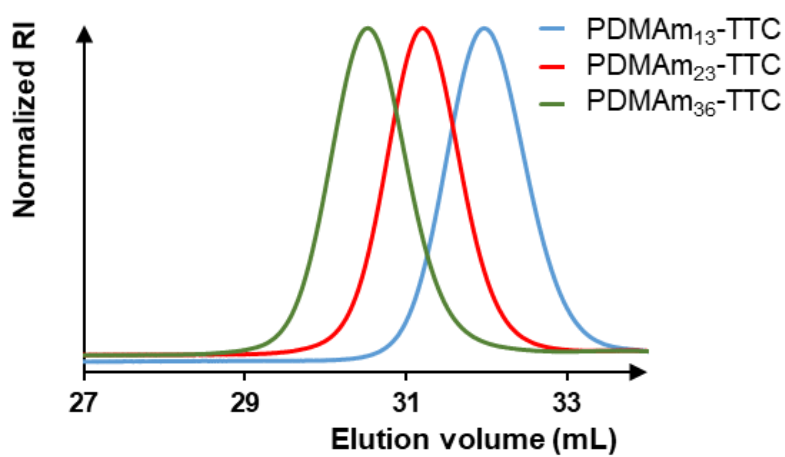

**Figure S2.** SEC chromatograms in DMF (+ LiBr) of the macroRAFT agents with different  $DP_{\text{nS}}$ .

## 2. Supplementary data

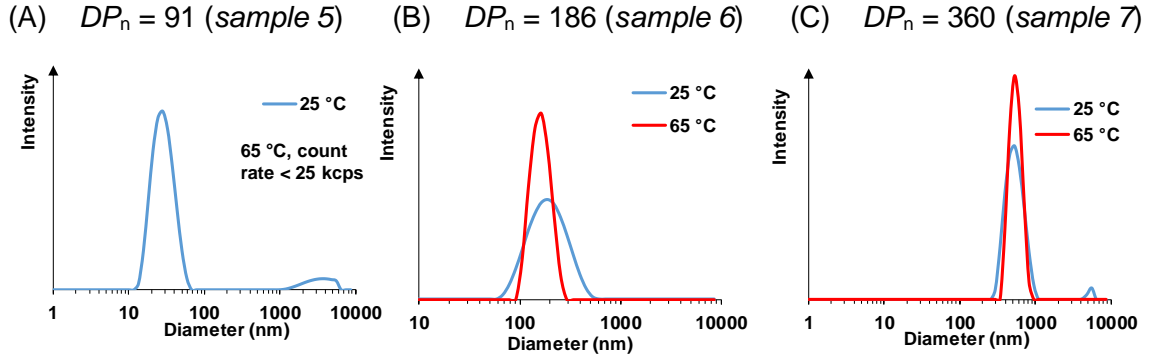

**Figure S3.** Temperature-dependent size distribution determined by DLS at 0.1 wt% in water for samples 5, 6 and 7 (PDMAM<sub>36</sub>-*b*-PCMA<sub>m</sub>).

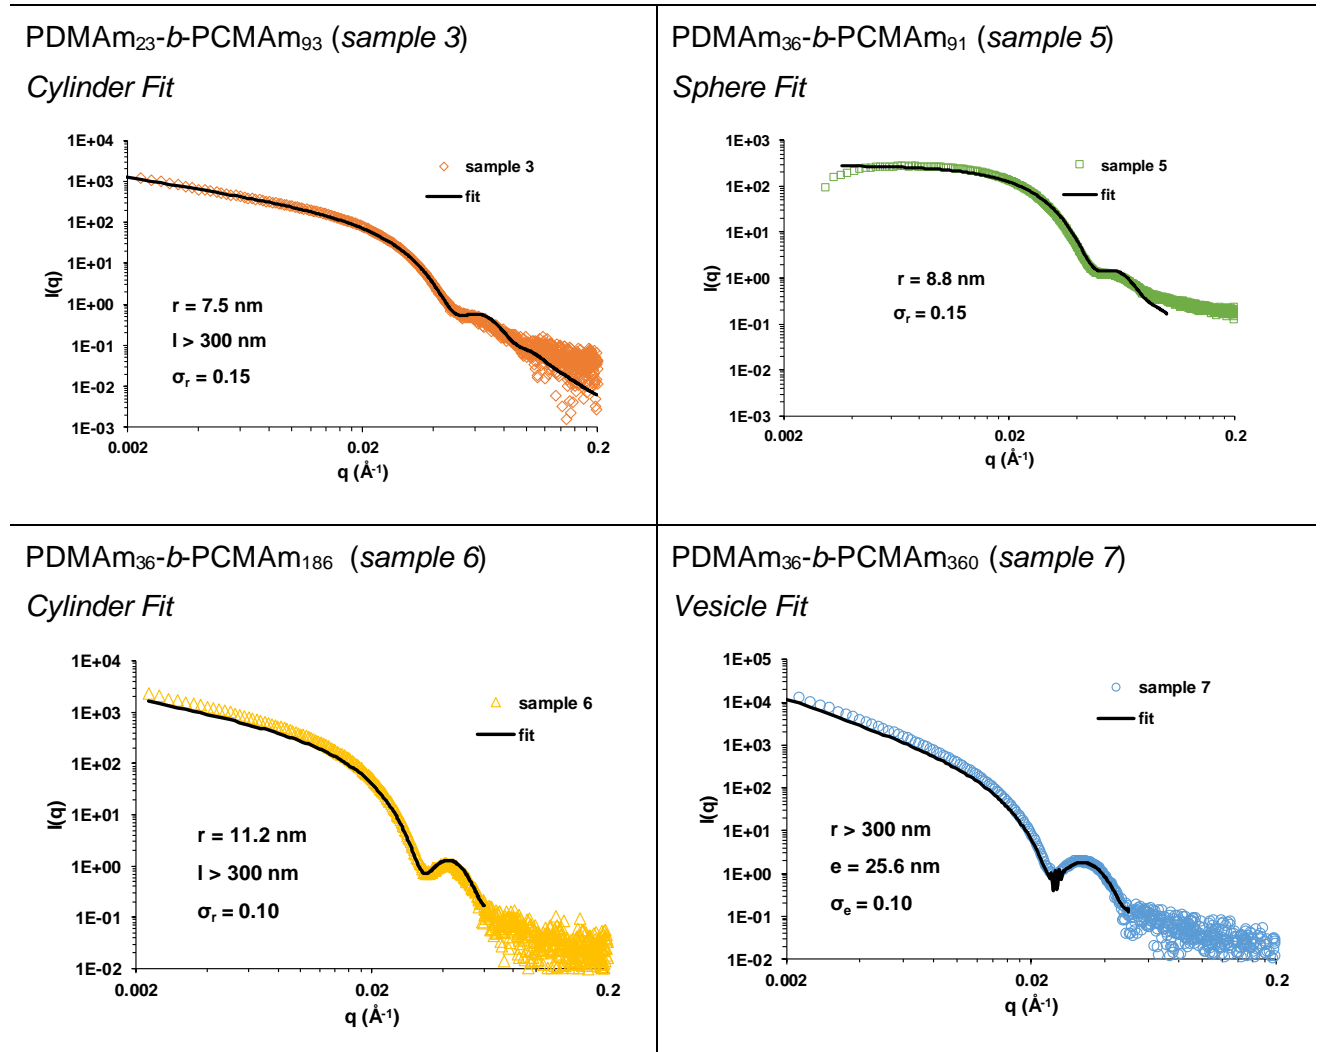

**Figure S4.** SAXS intensity ( $I$ ) versus scattering vector ( $q$ ) for selected diblock PDMAM-*b*-PCMA samples at 1 wt% in water at 25 °C (samples 3, 5, 6 and 7, Table 1).

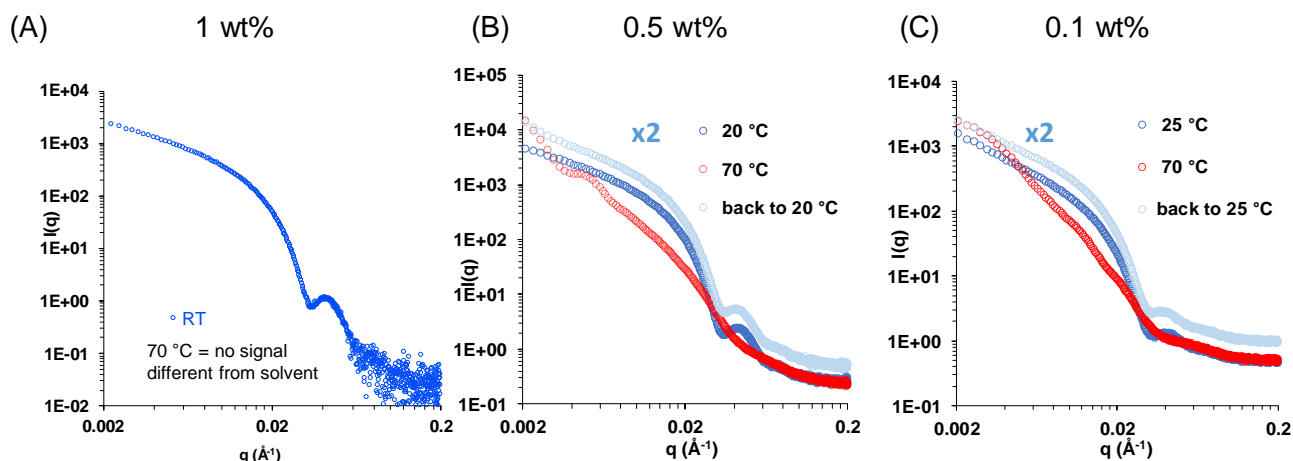

**Figure S5.** SAXS intensity ( $I$ ) versus scattering vector ( $q$ ) for PDMAm<sub>36</sub>-*b*-PCMAm<sub>186</sub> (*sample 6*) in water at (A) 1 wt%; (B) 0.5 wt% and (C) 0.1 wt% in water at 25 °C (or 20 °C) and 70 °C. For the samples cooled back after heating, the intensity was multiplied by a factor of 2 in order to visualize the signal, since it is a perfect overlay with the initial sample.

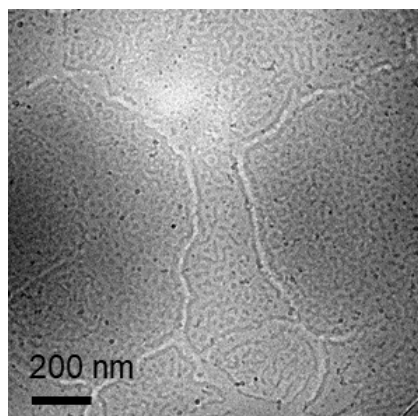

**Figure S6.** Selected cryo-TEM image of *sample 7* (PDMAm<sub>36</sub>-*b*-PCMAm<sub>360</sub>) prepared at 70 °C, showing the presence of additional morphologies different from standard vesicles. Sample concentration = 1 wt% in water.

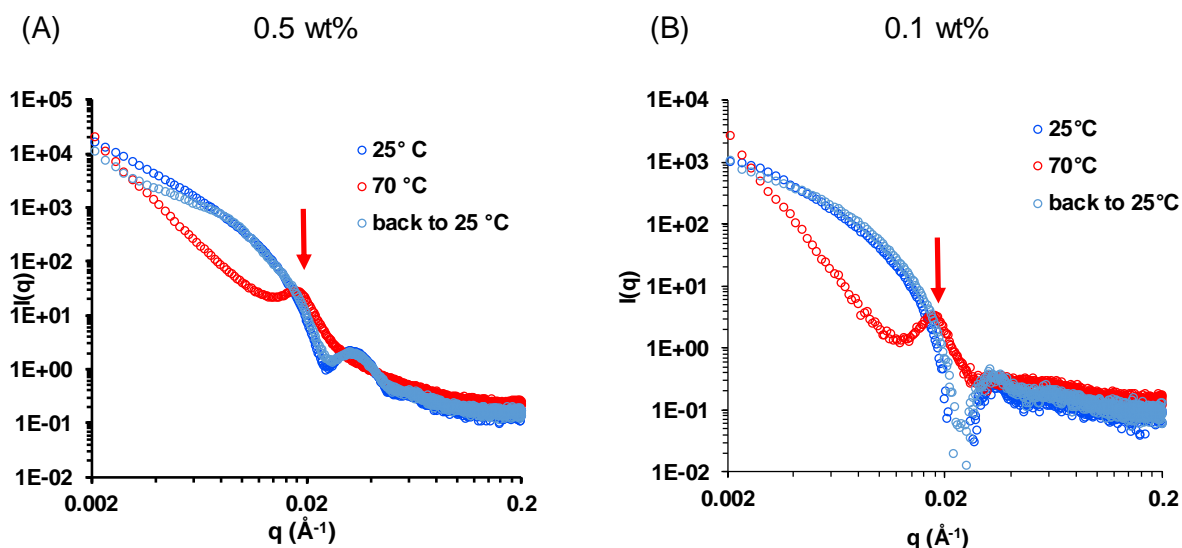

**Figure S7.** SAXS intensity ( $I$ ) versus scattering vector ( $q$ ) for PDMAm<sub>36</sub>-*b*-PCMAm<sub>360</sub> (*sample 7*) in water at (A) 0.5 wt% and (B) 0.1 wt% at 25 °C (dark blue), 70 °C (red) and back to 25 °C (light blue). The arrows designate  $d$ , the reciprocal length corresponding to the inter-vesicle distance.

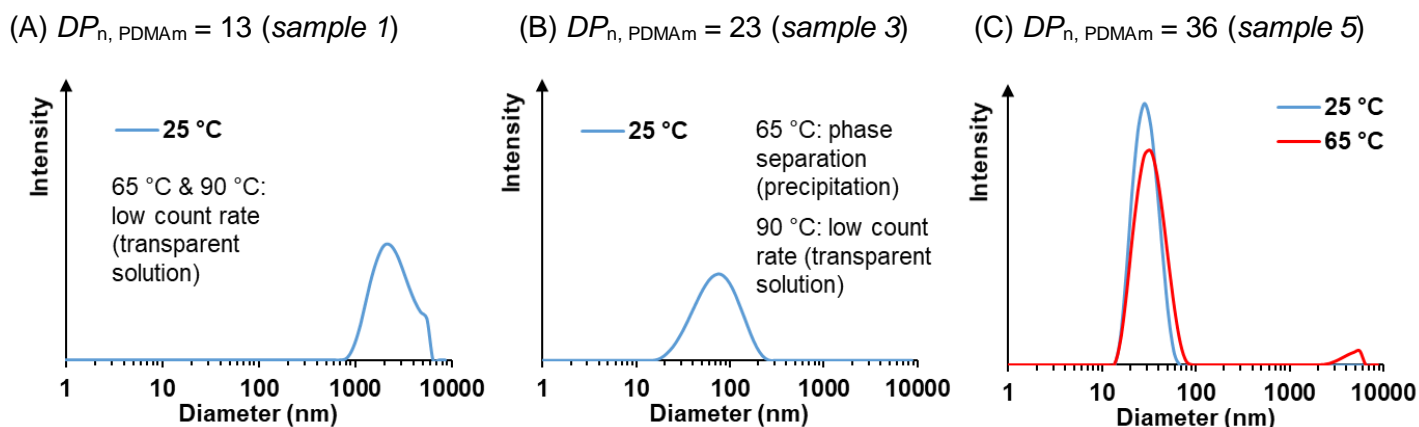

**Figure S8.** Size distributions determined by DLS of (A) PDMAm<sub>13</sub>-*b*-PCMAm<sub>90</sub> (*sample 1*), (B) PDMAm<sub>23</sub>-*b*-PCMAm<sub>90</sub> (*sample 3*) and (C) PDMAm<sub>36</sub>-*b*-PCMAm<sub>91</sub> (*sample 5*) dispersions prepared at 1 wt% in water at various temperatures.

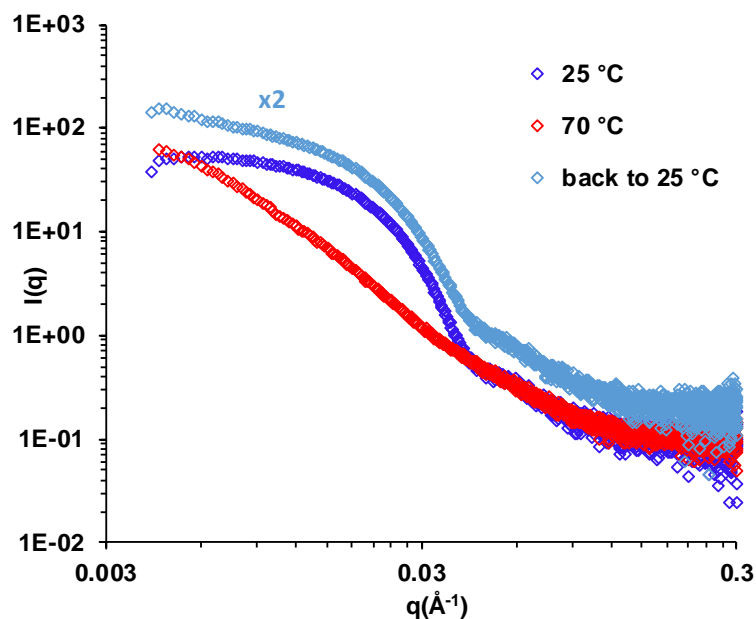

**Figure S9.** SAXS intensity ( $I$ ) versus scattering vector ( $q$ ) for PDMA<sub>m36</sub>-*b*-PCMA<sub>m91</sub> (*sample 5*) in water at 0.1 wt% at 25 °C (dark blue), 70 °C (red) and back to 25 °C (light blue, intensity multiplied by 2 in order to visualize the signal, since it is a perfect overlay with the initial sample before heating).

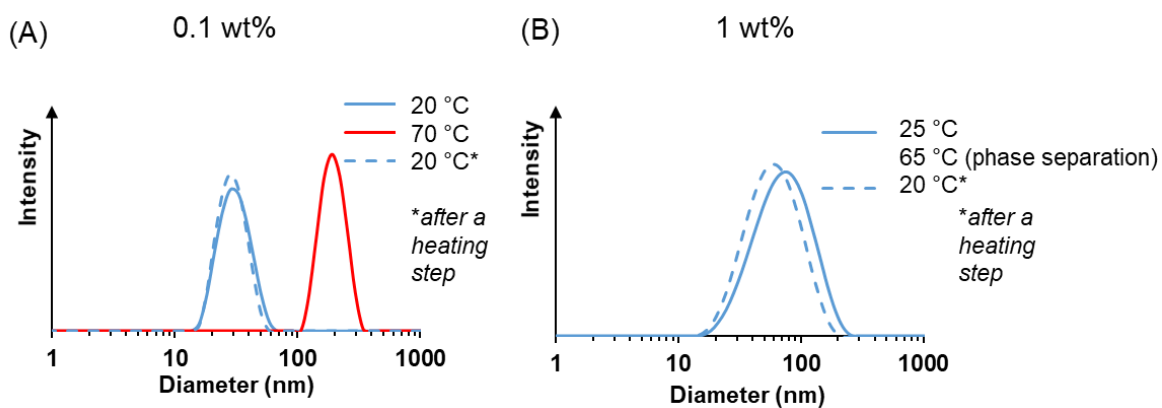

**Figure S10.** Size distribution of *sample 3* (PDMA<sub>m23</sub>-*b*-PCMA<sub>m93</sub>) at (A) 0.1 wt% and (B) 1 wt% in water determined by DLS at different temperatures. At 90 °C a very low scattering intensity was detected (kcps = 6 and 50, respectively for 0.1 wt% and 1 wt%).
